# Supplementary material for: Complex evolutionary processes maintain an ancient chromosomal inversion
Source: PubMed Central journal article supplement — Proc Natl Acad Sci U S A. 2023 Jun 13;120(25):e2300673120. doi: 10.1073/pnas.2300673120 (PMC10288594; doi:10.1073/pnas.2300673120), 2023-06-13
Supplement: pnas.2300673120.sapp.pdf [file pnas.2300673120.sapp.pdf]

1

## 2 **Supplementary Information for**

### 3 **Complex evolutionary processes maintain an ancient chromosomal inversion**

4 **Patrik Nosil, Victor Soria-Corrasco, Romain Villoutreix, Marisol De la Mora, Clarissa F. de Carvalho, Thomas Parchman, Jeffrey**  
5 **L. Feder, Zachariah Gompert**

6 **Patrik Nosil and Zachariah Gompert**

7 **E-mail: [patrik.nosil@cefe.cnrs.fr](mailto:patrik.nosil@cefe.cnrs.fr) and [zach.gompert@usu.edu](mailto:zach.gompert@usu.edu)**

#### 8 **This PDF file includes:**

- 9     Supplementary text
- 10    Figs. S1 to S11
- 11    Tables S1 to S9
- 12    SI References

## 13 Supporting Information Text

### 14 Materials and Methods

15 **Genome annotation.** We annotated the *Timema knulli* genome using the BRAKER2 (version 2.1.6) pipeline (1). Prior to genome  
16 annotation, we identified and masked repeat sequences using RepeatMasker (version 4.0.7). This was done using more sensitive  
17 slow search option, the NCBI search engine, and an existing repeat library developed for *Timema* stick insects (2). Repetitive  
18 regions were soft masked (set to lowercase letters).

19 BRAKER2 was used to automate training of the gene predictions tools GeneMark-EP+ (3) and AUGUSTUS (4, 5) using protein  
20 homology information. The pipeline begins with self-training using GeneMark-ES (6) to create an initial set of seed genes as  
21 described in the ProHint pipeline, which uses DIAMOND (v0.9.24.125) and Spaln (version 2.3.3d) (3, 7, 8) and a protein data base.  
22 We used the set of 2,601,995 arthropod proteins from OrthoDB (arthropod data set version 10, odb10\_arthropoda\_fasta.tar.gz)  
23 (9) as protein evidence. Output from this pipeline is then used for iterative model training with GeneMark-EP+ (3). A set of  
24 anchored genes from GeneMark-EP+ are then used to train AUGUSTUS (version 3.5.0) and predict the final set of genes. Functional  
25 annotation of the predicted *T. knulli* genes, specifically each CDS (coding sequence) was conducted using InterProScan  
26 (version 5.60-92.0) (10). Gene density was summarized based on the gene (GENE) annotations. Here, we determined the  
27 number of annotated genes in 5 megabase pair (mbp) windows across each *T. knulli* chromosome and then for the bounds of  
28 the *Perform* locus (the lower and upper bound plus or minus 5 mbps) and the remainder of the *Perform* locus.

29 **Assigning chromosome numbers.** To identify chromosomes (scaffolds) homologous to the *T. cristinae* linkage groups in our  
30 *T. knulli* genome, we first compared the *T. cristinae* reference plus linkage map to a more recent yet published *T. cristinae*  
31 genome from a green striped stick insect, which was constructed based on proximity ligation of DNA in chromatin and  
32 reconstituted chromatin (Hi-C) and comprised 13 large scaffolds, each corresponding to one of the 13 *T. cristinae* chromosomes  
33 (2). Specifically, we constructed a blast database from the 13 scaffolds of the newer (green striped) genome and then identified  
34 homologous scaffolds from the older melanic genome (and linkage map) by blasting each of these scaffolds against the database.  
35 This was done with blastn (version 2.11.0) with a minimum e-value of  $1e^{-50}$  and a minimum percent identity of 92. Only  
36 matches of >10,000 bps were considered (11). Then, in R (4.0.2), we computed the total length of matches between each of the  
37 13 linkage groups from the melanic *T. cristinae* genome and the 13 large scaffolds from the newer, green striped genome. In  
38 most cases, there was an unambiguous correspondence between linkage groups and chromosome scaffolds. However, our linkage  
39 groups 9 and 13 were under-assembled on the linkage map as both corresponded to a single scaffold, and much of the new  
40 scaffold 14101 was not mapped to any linkage group. Thus, our old linkage groups 9 and 13 were combined and are hereafter  
41 referred to as chromosome 9, and our new scaffold 14101 was denoted chromosome 13 (Table S2).

42 We then used cactus (version 1.0.0) to align the *T. knulli* genome to the green striped *T. cristinae* genome (12, 13).  
43 For this, we first used RepeatMasker (version 4.0.7) to mask repetitive regions of the genome (14); this was done using  
44 a repeat library developed for *Timema* (2). We then performed a pairwise alignment between the genomes with cactus.  
45 The HalSynteny tool was then used to extract syntenic alignment blocks from the comparative alignment (15) (<https://github.com/ComparativeGenomicsToolkit/hal>). We then identified homologous chromosomes by summing the total length of  
46 syntenic segments between each *T. cristinae* and *T. knulli* genome.  
47

48 **Nanopore sequencing and structural variant calling in *T. knulli*.** We used Oxford Nanopore long-read sequencing (16) to obtain  
49 additional evidence that the *Perform* locus is a segregating inversion within *T. knulli*. We chose this approach as we expected  
50 long DNA sequence reads to have a substantial chance of spanning and accurately detecting the expected large inversion (17).  
51 To do this, we extracted high-molecular weight DNA from a single *T. knulli* collected from BCE C (on *Ceanothus*) where the  
52 *Ceanothus* allele (that is the expected ancestral, non-inverted allele) occurs at high frequency. This was done with Qiagen's  
53 MagAttract HMW DNA kit (Qiagen, Inc.) in accordance with the manufacturer's protocol. We extracted DNA from two  
54 samples taken from the thorax of this individual, which yielded 803 and 1018 nanograms of DNA respectively on a dsDNA HS  
55 (high sensitivity) assay with a Qubit f4 fluorometer (Thermo Fisher). We then repaired and polished the DNA molecules with  
56 the NEBNEXT FFPE DNA Repair Mix and NEBNEXT Ultra II end-repair/dA-tailing module in accordance with Oxford  
57 Nanopore's suggested protocol. The two DNA samples were then pooled and adaptor oligos for sequencing were added with  
58 the Oxford Nanopore ligation sequencing kit (SQK-LSK109). We sequenced the resulting library on a R9.4 flow cell with a  
59 MiniION using a 72 hour run time. We used guppy\_basecaller (version 6.1.7\_gpu) to call nucleotides from the raw output.  
60 This generated 471,648 sequences with a total length of 863 megabases (about  $0.5\times$  genome coverage). Note that while this is  
61 low coverage, it proved sufficient to validate the expected inversion as described below.

62 We first used NanoFilt (18) to remove bases with quality scores less than 6 and then aligned the filtered nanopore DNA  
63 sequences to the *T. knulli* reference genome with minimap2 (version 2.23-r1117) (19). We used the preset option for mapping  
64 Nanopore reads against a reference (-x map-ont) and used soft clipping for supplementary alignments. samtools (version 1.12)  
65 was used to compress, sort and index the alignments (20). We then used sniffles2 (version 2.0.3) to call structural variants  
66 (21). We required an alignment length of at least 100 bps, a mapping quality of at least 15, and a minimum structural variant  
67 length of 35 bps supported by at least one read for variant calling. We then focused specifically on inversions on chromosome  
68 11 that were 1 mbp or greater in length; there were five of these, one of which spanned the *Perform* locus (see Figure S6 for  
69 details).

70 **Population genomic analyses of LD and heterozygosity.** We summarized patterns of linkage disequilibrium (LD) and observed  
71 heterozygosity on chromosome 11 within and outside of the *Perform* locus to further test the hypothesis that the *Perform*  
72 locus is a polymorphic inversion within *T. knullii*. For LD, we focused on common SNPs (minor allele frequency > 0.05) on  
73 chromosome 11 in the BCE population (where Redwood and *Ceanothus* co-occur). We then computed pairwise LD, as the  
74 squared genotypic correlation ( $r^2$ ) for each pair of the 1537 SNPs that met the above criteria. This was done separately for  
75  $P_{RW}P_{RW}$  homozygotes,  $P_{RW}P_C$  heterozygotes,  $P_C P_C$  homozygotes, and the combination of  $P_{RW}P_{RW}$  and  $P_C P_C$  homozygotes.  
76 If *Perform* is a segregating inversion, we would expect elevated LD within *Perform* for the combined sample of  $P_{RW}P_{RW}$  and  
77  $P_C P_C$  homozygotes relative to other parts of chromosome 11 and samples comprising only a single genotype. Patterns of LD  
78 were summarized using heatmaps. This was done in R (version 4.1.3). For observed heterozygosity, we first converted our SNP  
79 genotype estimates to the nearest integer value, where 1 thus denotes a heterozygote for a SNP. We then computed the mean  
80 heterozygosity in each *Perform* genotype cluster ( $P_{RW}P_{RW}$  homozygotes,  $P_{RW}P_C$  heterozygotes, and  $P_C P_C$  homozygotes)  
81 for each SNP on chromosome 11 (including the *Perform* locus). We expect elevated heterozygosity for  $P_{RW}P_C$  heterozygotes  
82 within the *Perform* locus if this locus is a segregating inversion in *T. knullii*. This analysis was conducted in R (version 4.1.3)  
83 as well.

84 **ABC inference of gene flow and selection.** We used approximate Bayesian computation (ABC) to fit and compare alternative  
85 models for selection with gene flow in the *T. knullii*-*Ceanothus*-Redwood system (22, 23). We first fit a Bayesian F-model to  
86 estimate (putative neutral) migration rates,  $Nm$  (number of migrants per generation), between our three main populations:  
87 BCE C (BCE on *Ceanothus*), BCE RW (BCE on Redwood; parapatric with BCE C) and BCTURN (on *Ceanothus*, allopatric  
88 with respect to BCE C and BCE RW) (24, 25). This statistical model approximates several population genetic models,  
89 including an island model of drift-gene flow equilibrium (26–29). Estimates of gene flow were based on allele frequencies in each  
90 population, but excluding chromosome 11 (i.e., the chromosome harboring the *Perform* locus). For this analysis, we placed  
91 Cauchy priors on  $Nm$  (the number of migrants) with bounds of 0 and 50, a location parameter of 0 and a scale parameter  
92 of 10, and Jeffery’s beta priors on the migrant allele frequencies (lower bounds = 0, upper bounds = 1,  $\alpha = 0.5$ ,  $\beta = 0.5$ ).  
93 We fit this model in R using Hamiltonian Monte Carlo via the R interface with STAN (rstan version 2.21.2) (30). Posteriors  
94 were inferred from 10 independent Markov chain Monte Carlo (MCMC) analyses, with each chain using a random subset of  
95 5000 (out of 62,093) SNPs (this was done to increase computation speed and reduce LD among loci). For each run, we used 4  
96 independent chains, each comprising 2000 iterations and a 1000 iteration burnin. The No-U-Turn sampler (NUTS) was used for  
97 updates (31). The Gelman-Rubin convergence diagnostic was computed to verify likely convergence of the MCMC algorithm to  
98 the posterior distribution.

99 We next fit ABC models for selection on *Perform*, with gene flow based on our estimates from the F-model described in the  
100 preceding section. Our goal here was to compare models of divergent selection (directional selection in opposing directions on  
101 different hosts) to heterozygote advantage while accounting for drift and gene flow, and to estimate the strength of selection  
102 under these models. Here, we assumed three populations, BCE C (on *Ceanothus*), BCE RW (on Redwood) and BCTURN (on  
103 *Ceanothus*) with host-dependent selection on *Perform*, that is, we assumed one set of selection coefficients for BCE C and  
104 BCTURN and a second set of selection coefficients for BCE RW. We allowed for one of two models for selection on each host:  
105 (i) directional selection, where one homozygote was the most fit, or (ii) heterozygote advantage (overdominance), where the  
106 *Perform* heterozygotes were the most fit. With directional selection, we assumed  $w_{11} = 1 + s$ ,  $w_{12} = 1 + hs$ , and  $w_{22} = 1$ ,  
107 where  $w_{11}$ ,  $w_{12}$  and  $w_{22}$  are relative fitnesses for the *Perform* genotypes,  $s$  is the selection coefficient, and  $h$  is the heterozygote  
108 effect, and  $w_{11}$  refers to the genotype that was more fit on Redwood in the experiments and that was at higher frequency in  
109 BCE RW (i.e., the  $P_{RW}P_{RW}$  homozygote). We placed uniform priors on  $h$  (lower bounds = 0 upper bounds = 1) and log  
110 uniform priors on the absolute value of  $s$  with bounds of 0.001 and 0.9 (-6.91 and -0.11 on the natural-log scale). We assumed  
111  $s$  was positive on Redwood and negative on *Ceanothus* (i.e., alternative homozygotes favored on each host). For heterozygote  
112 advantage (i.e., overdominance), we assumed  $w_{11} = 1 - s_1$ ,  $w_{12} = 1$ , and  $w_{22} = 1 - s_2$ , where  $s_1$  and  $s_2$  denote the decrease in  
113 relative fitness of the two alternative homozygotes ( $P_{RW}P_{RW}$  and  $P_C P_C$ , respectively). We used the same log-uniform priors  
114 on  $s_1$  and  $s_2$  as were used for  $s$ , with the added constraint of  $s_1 < s_2$  on Redwood and  $s_1 > s_2$  on *Ceanothus*. We placed  
115 equal prior probabilities of directional selection versus heterozygote advantage on each host (i.e., 0.5 each) and allowed for the  
116 models to differ on the two hosts.

117 We modeled evolution following a generalized Wright-Fisher model with selection and gene flow. Specifically, the expected  
118 allele frequency change at *Perform* for each population was  $E[\Delta p] = \Delta p_s + \Delta p_m$ , where  $\Delta p_s$  and  $\Delta p_m$  are the expected  
119 change caused by selection and gene flow respectively. We assumed  $\Delta p_s = sp(1 - p)[p + h(1 - 2p)]$  for directional selection or  
120  $\Delta p_s = p(1 - p)[s_2 - p(s_1 + s_2)]$  for heterozygote advantage, and  $\Delta p_m = m_{ba}(p_a - p_b) + m_{ca}(p_a - p_c)$  where  $m_{ba}$  and  $m_{ca}$  are  
121 the migration rates (proportions) from populations  $b$  and  $c$  to population  $a$ , and  $p_b$  and  $p_c$  are the corresponding migrant  
122 and source population allele frequencies (32). We then assumed that the actual allele frequency in each population following  
123 selection, gene flow and drift was  $p_{t+1} \sim \text{binomial}(p = p_t + E[\Delta p], 2N_e)$ , where  $N_e$  is the variance effective population size  
124 for the relevant population (BCE C, BCE RW, or BCTURN). We did not attempt to estimate  $N_e$ , but rather to integrate  
125 over uncertainty in contemporary  $N_e$  (i.e., we treat this as a nuisance parameter). Specifically, we assumed re-scaled beta  
126 priors on  $N_e$  for each population with a lower bound of 50, an upper bound of 1000 and  $\alpha$  and  $\beta$  set to 6 (symmetrical about  
127 the mean of  $N_e = 525$  and relatively flat over the range). We allowed for asymmetric gene flow with expectations set by the  
128 neutral gene flow Bayesian F-model defined above. Specifically, for population pair  $i$  and  $j$ , we assumed re-scaled beta priors  
129 on  $Nm_{ij}$  and  $Nm_{ji}$  with lower and upper bounds set to the 2.5th and 97.5th percentiles of the posterior from the neutral  
130 F-model and  $\alpha$  and  $\beta$  set to 10 (again symmetrical and relatively but slightly less flat over the range). We then solved for, e.g.,

131  $m_{ij}$  as  $m_{ij} = \frac{Nm_{ij}}{N_e}$  (with  $N_e$  denoting  $N_e$  for population  $j$ ).

132 We conducted 25 million simulations of evolution to estimate the model and parameter posterior probabilities. In each  
133 case, the selection models and all relevant parameters were sampled from their priors. We then simulated evolution for 2500  
134 generations starting from *Perform* allele frequencies of 0.5 for all populations (this was sufficient time to remove sensitivity to  
135 our initial allele frequency but not so long to ensure one allele was lost, as will always ultimately be the case given sufficient  
136 time without recurrent mutation). Simulations were performed using a custom program written in C++ with functions from  
137 the Gnu Scientific Library (33). We used the vector of final (at generation 2500) *Perform* allele frequencies for the three  
138 populations as the output (summary statistics) from the simulations. Thus, the allele frequency vectors from the 25 million  
139 simulations were compared to the actual *Perform* allele frequency vector for the three populations. Using the rejection algorithm  
140 from the **abc** R package (version 2.1; R version 4.0.2) (34) we identified the 0.004% (1000 out of 25 million) of simulations  
141 resulting in the smallest Euclidean distance between the simulated and observed allele frequencies. Model posteriors were  
142 computed as the proportion of these retained simulations arising from each model (i.e., each combination of directional selection  
143 versus heterozygote advantage for the two host plants). The model of heterozygote advantage on both host plants had the  
144 highest posterior probability. Consequently, we estimated the selection coefficients ( $s_1$  and  $s_2$ ) on each host plant under  
145 the heterozygote advantage model (model-averaging is not appropriate as the selection coefficients do not have a consistent  
146 definition across models). This was done by considering the 0.015% ( $\sim 1000$ ) of simulations with heterozygote advantage on  
147 both hosts with smallest distance between observed and simulated summary statistics, and performing ridge regression for  
148 parameter adjustment on the log-transformed selection coefficients. This was also done with the **abc** R package (version 2.1)  
149 (34).

150 **Dating the chromosomal inversion with  $\delta a\delta i$ .** We estimated the divergence time between the *Perform* chromosomal variants in  
151 a population genetic context with the diffusion approximation approach implemented in  $\delta a\delta i$  (35). We specifically followed  
152 an approach inspired by (36), which modeled recombination between subgenomes (in polyploids) as being analogous to gene  
153 flow between populations. We focused on the BCE population and designated two “populations”, each comprising individuals  
154 homozygous for one of the *Perform* inversion alleles. We assumed these populations were descended from a single ancestral  
155 population with a mutation-scaled effective population size of  $\theta$  ( $4N_{anc}\mu$ , where  $\mu$  is the locus mutation rate) that diverged at  
156 time  $T_{split}$  (measured in  $2N_{anc}$  generations), which corresponds with the origin time for the inversion (i.e., the creation of the  
157 two distinct inversion haplotypes). We allowed for the relative effective sizes of the two inversion “populations” to increase  
158 or decrease over time based on population growth parameters  $\nu_1 = N_1/N_{anc}$  and  $\nu_2 = N_2/N_{anc}$ ; this could reflect selection  
159 or drift in inversion allele frequencies. We modeled potential genetic exchange (recombination or gene conversion) between  
160 inversion alleles (populations) using the migration rate parameter from  $\delta a\delta i$ ,  $M_{12} = 2N_{anc}m_{12}$  and  $M_{21} = 2N_{anc}m_{21}$  (here  
161  $m_{12}$  and  $m_{21}$  are proportions), as in (36). Thus, our estimate of the divergence time between inversion alleles accounts for  
162 possible reduced DNA sequence divergence resulting from recombination within the inversion.

163 We used  $\delta a\delta i$  (with Python 3.9.7) to first infer the joint site frequency spectrum for our two populations, one comprising  
164 25  $P_{RW}P_{RW}$  homozygotes (the allele more common on Redwood) and one comprising 33  $P_C P_C$  homozygotes (the all more  
165 common on *Ceanothus*) (all from BCE); this was done within  $\delta a\delta i$  directly from the filtered vcf file. We down-sampled the  
166 data at this stage to 70% of the smaller size (i.e., 70% of 25 diploids). We then used  $\delta a\delta i$  to estimate the model parameters,  
167 specifically  $\theta$ ,  $T_{split}$ ,  $\nu_1$ ,  $\nu_2$ , and the genetic exchange parameters  $M_{12} = 2N_{anc}m_{12}$  and  $M_{21} = 2N_{anc}m_{21}$  (here  $m_{12}$  and  $m_{21}$   
168 are proportions) (see [https://github.com/zgompert/TimemaRW/blob/main/im\\_dadi\\_old.py](https://github.com/zgompert/TimemaRW/blob/main/im_dadi_old.py)). We used three rounds of numerical  
169 optimization, comprising 20, 10 and five iterations each to estimate the model parameters.

170 We then used the average of two published per-base mutation rates for insects,  $2.9e^{-9}$  for *Heliconius* and  $2.8e^{-9}$  for  
171 *Drosophila* (37), to convert our estimates of divergence time to time in years (or equivalently generations as *Timema* are  
172 univoltine). This conversion also required an estimate of the number of sequenced bases for the *Perform* locus so that we  
173 could compute the per-locus mutation rate ( $\mu$  in  $\delta a\delta i$ ). Importantly, this is not the same as the total length of the locus as  
174 not all bases were sequenced, and even considering only sequenced bases not all were sequenced to high coverage or exhibited  
175 properties that would have allowed a SNP to have been called at a nucleotide position even if it were variable. Thus, we first  
176 used the **samtools** (version 1.5) **depth** command to determine the number of bases within *Perform* sequenced to at least  $2\times$   
177 coverage (average per individual), which was the same threshold used for variant calling. We then tried to account for the  
178 fact that a subset of these sites would not pass other filtering criteria. Specifically, we calculated the proportion of SNPs that  
179 passed the coverage filter but failed quality control based on other filters (about 2/3rds of the initial SNPs) and assumed that  
180 this same proportion of non-SNPs would have been filtered out if they had been variable. This gave us an effective number of  
181 sequenced bases of 53,538.3, which we used in combination with the per-base mutation rate to calculate the divergence time in  
182 years (see <https://github.com/zgompert/TimemaRW/blob/main/ComputeDate.R>). Confidence intervals on the divergence time were  
183 inferred using a block-jackknife procedure to account for the non-independence among SNPs within *Perform*. Specifically, the  
184 SNPs within *Perform* were divided into 100 contiguous 18 SNP windows and divergence time estimates were obtained for each  
185 unique data subset of 99 of the 100 SNP windows.



**Table S1. Summary of samples and genetic data used to measure host-associated genetic differentiation. Host abbreviations are: C = *Ceanothus*, P = *Pseudotsuga menziesii* (Douglas fir), A = *Arctostaphylos* (Manzanita), Pi = *Pinus*, Q = *Quercus*, RW = *Sequoia sempervirens* (Redwood). N1 and N2 denote the sample sizes for populations 1 and 2, respectively. See Riesch et al. (38) for additional information about these populations.**

| Species                | Population 1 | Population 2 | N1 | N2 | Number of SNPs |
|------------------------|--------------|--------------|----|----|----------------|
| <i>T. californicum</i> | SM on A      | SM on Q      | 17 | 20 | 7858           |
| <i>T. knulli</i>       | BCE on RW    | BCWP on C    | 15 | 12 | 1139           |
| <i>T. knulli</i>       | BCTUR on C   | BCTUR on Pi  | 17 | 16 | 1139           |
| <i>T. landelsensis</i> | BCBOG on C   | BCBOG on Q   | 23 | 20 | 8548           |
| <i>T. landelsensis</i> | BCSUM on C   | BCSUM on Q   | 20 | 11 | 8548           |
| <i>T. poppensis</i>    | TBARN on P   | TBARN on RW  | 20 | 20 | 7157           |

**Table S2. Summary of the relationships between our current chromosome number system (based on *T. cristinae*), our previous *T. cristinae* genome that used linkage groups (39), and the numbers (IDs) for the chromosome-scale scaffolds in *T. cristinae* (GS = green striped morph), *T. knulli*, and *T. chumash* genomes here based on whole genome-alignments. Note that our earlier linkage groups corresponded with *T. cristinae* chromosomes with two exceptions, one chromosome (now 9 = *T. cristinae* GS scaffold 16151) was split between two linkage groups, and the sex chromosome, X (now 13 = *T. cristinae* GS scaffold 14101) was not assigned to any linkage group.**

| <i>T. cristinae</i><br>chromosome number | Old <i>T. cristinae</i><br>linkage group | <i>T. cristinae</i> (GS)<br>scaffold number | <i>T. knulli</i><br>scaffold number | <i>T. chumash</i><br>scaffold number |
|------------------------------------------|------------------------------------------|---------------------------------------------|-------------------------------------|--------------------------------------|
| 1                                        | 1                                        | 8483                                        | 29                                  | 43                                   |
| 2                                        | 2                                        | 14640                                       | 813                                 | 1392                                 |
| 3                                        | 3                                        | 42935                                       | 29                                  | 43                                   |
| 4                                        | 4                                        | 42912                                       | 6886                                | 43                                   |
| 5                                        | 5                                        | 18722                                       | 6895                                | 56                                   |
| 6                                        | 6                                        | 9928                                        | 6839                                | 1469                                 |
| 7                                        | 7                                        | 10660                                       | 934                                 | 1510                                 |
| 8                                        | 8                                        | 7748                                        | 6852                                | 113                                  |
| 9                                        | 9,13                                     | 16151                                       | 1305                                | 43                                   |
| 10                                       | 10                                       | 14160                                       | 30                                  | 1213                                 |
| 11                                       | 11                                       | 12033                                       | 500                                 | 48                                   |
| 12                                       | 12                                       | 12380                                       | 6840                                | 1403                                 |
| 13                                       | NA                                       | 14101                                       | 775                                 | 1308                                 |

**Table S3. Summary of samples for the *T. knulli* performance experiment and associated genetic analyses. Host abbreviations are: C = *Ceanothus* and RW = Redwood (*Sequoia sempervirens*). BCE, BCSH and BCXD are very near each other and all treated as "BCE" for analyses the simply exclude BCTURN. N denotes sample size.**

| Population | Host | Latitude (°N) | Longitude (°W) | N  |
|------------|------|---------------|----------------|----|
| BCE        | C    | 36.07         | 121.60         | 68 |
| BCE        | RW   | 36.07         | 121.60         | 24 |
| BCSH       | RW   | 36.07         | 121.60         | 1  |
| BCTURN     | C    | 36.08         | 121.61         | 37 |
| BCXD       | C    | 36.07         | 121.60         | 8  |

**Table S4.** Sample sizes from population BCE in the rearing experiment used in the regression analysis connecting *Perform* genotype to performance. Counts are given for each combination of source host (RW = Redwood, C = *Ceanothus*), *Perform* genotype, host treatment (columns, Redwood or *Ceanothus*) and sex. Variability in sample sizes for different source and genotype combinations reflects the different frequencies of *Perform* alleles on different hosts.

| Source | Genotype       | Redwood |      | <i>Ceanothus</i> |      |
|--------|----------------|---------|------|------------------|------|
|        |                | female  | male | female           | male |
| RW     | $P_{RW}P_{RW}$ | 5       | 1    | 5                | 6    |
|        | $P_{RW}P_C$    | 3       | 3    | 2                | 0    |
|        | $P_CP_C$       | 0       | 0    | 0                | 0    |
| C      | $P_{RW}P_{RW}$ | 3       | 2    | 2                | 1    |
|        | $P_{RW}P_C$    | 11      | 5    | 14               | 5    |
|        | $P_CP_C$       | 12      | 4    | 13               | 4    |

**Table S5.** Summary of regression models for 15-day weight in the *T. knulli* experiment. Results are shown for the Redwood (RW) and *Ceanothus* host treatments for models with *Perform* genotype (G), host source (H), or both factors and their interaction (G:H). Effects of sex and developmental stage were removed prior to analysis. Regression parameter estimates ( $\beta$ ) and associated *P*-values are reported along with the overall model  $r^2$ , *P*-value and Akaike information criterion metric (AIC). The model with the lowest AIC (i.e., the best model) for each host treatment is denoted with an asterisk.

| Model  | Genotype |       | Host    |       | Genotype:Host |       | Model |       |         |
|--------|----------|-------|---------|-------|---------------|-------|-------|-------|---------|
|        | $\beta$  | P     | $\beta$ | P     | $\beta$       | P     | $r^2$ | P     | AIC     |
| RW G*  | -0.009   | 0.033 |         |       |               |       | 0.106 | 0.033 | -213.43 |
| RW H   |          |       | 0.013   | 0.071 |               |       | 0.077 | 0.071 | -212.09 |
| RW G:H | -0.004   | 0.428 | 0.038   | 0.075 | 0.020         | 0.120 | 0.179 | 0.051 | -213.09 |
| C G*   | -0.018   | 0.010 |         |       |               |       | 0.132 | 0.010 | -184.45 |
| C H    |          |       | 0.013   | 0.339 |               |       | 0.019 | 0.339 | -178.35 |
| C G:H  | -0.027   | 0.006 | -0.056  | 0.192 | 0.030         | 0.323 | 0.169 | 0.035 | -182.65 |

**Table S6.** Summary of regression models for 21-day weight in the *T. knulli* experiment. Results are shown for the Redwood (RW) and *Ceanothus* host treatments for models with *Perform* genotype (G), host source (H), or both factors and their interaction (G:H). Effects of sex and developmental stage were removed prior to analysis. Regression parameter estimates ( $\beta$ ) and associated *P*-values are reported along with the overall model  $r^2$ , *P*-value and Akaike information criterion metric (AIC). The model with the lowest AIC (i.e., the best model) for each host treatment is denoted with an asterisk.

| Model  | Genotype |       | Host    |       | Genotype:Host |       | Model |       |         |
|--------|----------|-------|---------|-------|---------------|-------|-------|-------|---------|
|        | $\beta$  | P     | $\beta$ | P     | $\beta$       | P     | $r^2$ | P     | AIC     |
| RW G   | -0.004   | 0.418 |         |       |               |       | 0.016 | 0.418 | -186.15 |
| RW H*  |          |       | 0.026   | 0.004 |               |       | 0.189 | 0.004 | -194.48 |
| RW G:H | 0.004    | 0.469 | 0.038   | 0.162 | -0.006        | 0.709 | 0.201 | 0.032 | -191.08 |
| C G*   | -0.019   | 0.019 |         |       |               |       | 0.116 | 0.019 | -163.68 |
| C H    |          |       | 0.006   | 0.703 |               |       | 0.003 | 0.703 | -158.04 |
| C G:H  | -0.023   | 0.030 | 0.033   | 0.495 | -0.044        | 0.196 | 0.184 | 0.032 | -163.44 |

**Table S7. Summary of regression models for survival in the *T. knulli* experiment. Results are shown for the Redwood (RW) and *Ceanothus* host treatments for models a null model (intercept only) and models with *Perform* genotype (G), host source (H), sex (S) or combinations of two factors and their interaction (G:H and G:S). The overall model  $r^2$  and *P*-value from a simple linear model fit and the Akaike information criterion metric (AIC) assuming a normal or binomial error distribution are reported. The model with the lowest AIC based on the binomial error distribution (i.e., the best model) for each host treatment is denoted with an asterisk.**

| Model    | $r^2$ | P     | AIC (normal) | AIC (binomial) |
|----------|-------|-------|--------------|----------------|
| RW null* | NA    | NA    | 25.95        | 34.30          |
| RW G     | 0.002 | 0.759 | 27.85        | 36.20          |
| RW H     | 0.001 | 0.810 | 27.89        | 36.23          |
| RW S     | 0.006 | 0.596 | 27.65        | 35.98          |
| RW G:H   | 0.020 | 0.818 | 30.94        | 39.83          |
| RW G:S   | 0.009 | 0.934 | 31.48        | 38.73          |
| C null   | NA    | NA    | 32.90        | 39.19          |
| C G*     | 0.115 | 0.014 | 28.52        | 34.60          |
| C H      | 0.121 | 0.012 | 28.21        | 35.83          |
| C S      | 0.079 | 0.044 | 30.63        | 37.44          |
| C G:H    | 0.169 | 0.029 | 29.25        | 37.52          |
| C G:S    | 0.188 | 0.018 | 28.08        | 36.61          |



**Table S8. Number and proportion (in parantheses) of *T. knulli* surviving to the end of the experiment as a function of *Perform* genotype, host treatment (Redwood or *Ceanothus*) and sex.**

| Genotype                            | Redwood      |            | <i>Ceanothus</i> |            |
|-------------------------------------|--------------|------------|------------------|------------|
|                                     | female       | male       | female           | male       |
| <i>P<sub>RW</sub>P<sub>RW</sub></i> | 8/8 (1.00)   | 3/3 (1.00) | 6/7 (0.86)       | 4/7 (0.57) |
| <i>P<sub>RW</sub>P<sub>C</sub></i>  | 11/14 (0.79) | 7/8 (0.88) | 15/16 (0.94)     | 4/5 (0.80) |
| <i>P<sub>C</sub>P<sub>C</sub></i>   | 11/12 (0.92) | 4/4 (1.00) | 13/13 (1.00)     | 4/4 (1.00) |

**Table S9. Model parameter estimates from  $\delta a \delta i$ . The scaled parameters presented are defined as follows:  $\theta = 4N_{anc}\mu$ ,  $\nu_1 = N_1/N_{anc}$ ,  $\nu_2 = N_2/N_{anc}$ ,  $T_{split} = 2N_{anc}t_{split}$ ,  $M_{12} = 2N_{anc}m_{12}$ ,  $M_{21} = 2N_{anc}m_{21}$ , where  $N$  and  $t$  denote actual effective population sizes and time in generations (years) and  $\mu$  is the total mutation rate for the locus. 95% CIs denote 95% block-jackknife confidence intervals. Here, populations 1 and 2 refer to homozygotes for  $P_s$  (more common on *Ceanothus*) and  $P_g$  (more common on Redwood), respectively.**

| Parameter   | Estimate | 95% CI lower | 95% CI upper |
|-------------|----------|--------------|--------------|
| $\theta$    | 111.184  | 41.845       | 234.364      |
| $\nu_1$     | 0.231    | 0.106        | 0.631        |
| $\nu_2$     | 3.901    | 1.875        | 10.386       |
| $T_{split}$ | 13.833   | 2.573        | 28.976       |
| $M_{12}$    | 0.367    | 0.134        | 0.782        |
| $M_{21}$    | 0.110    | 0.040        | 0.248        |



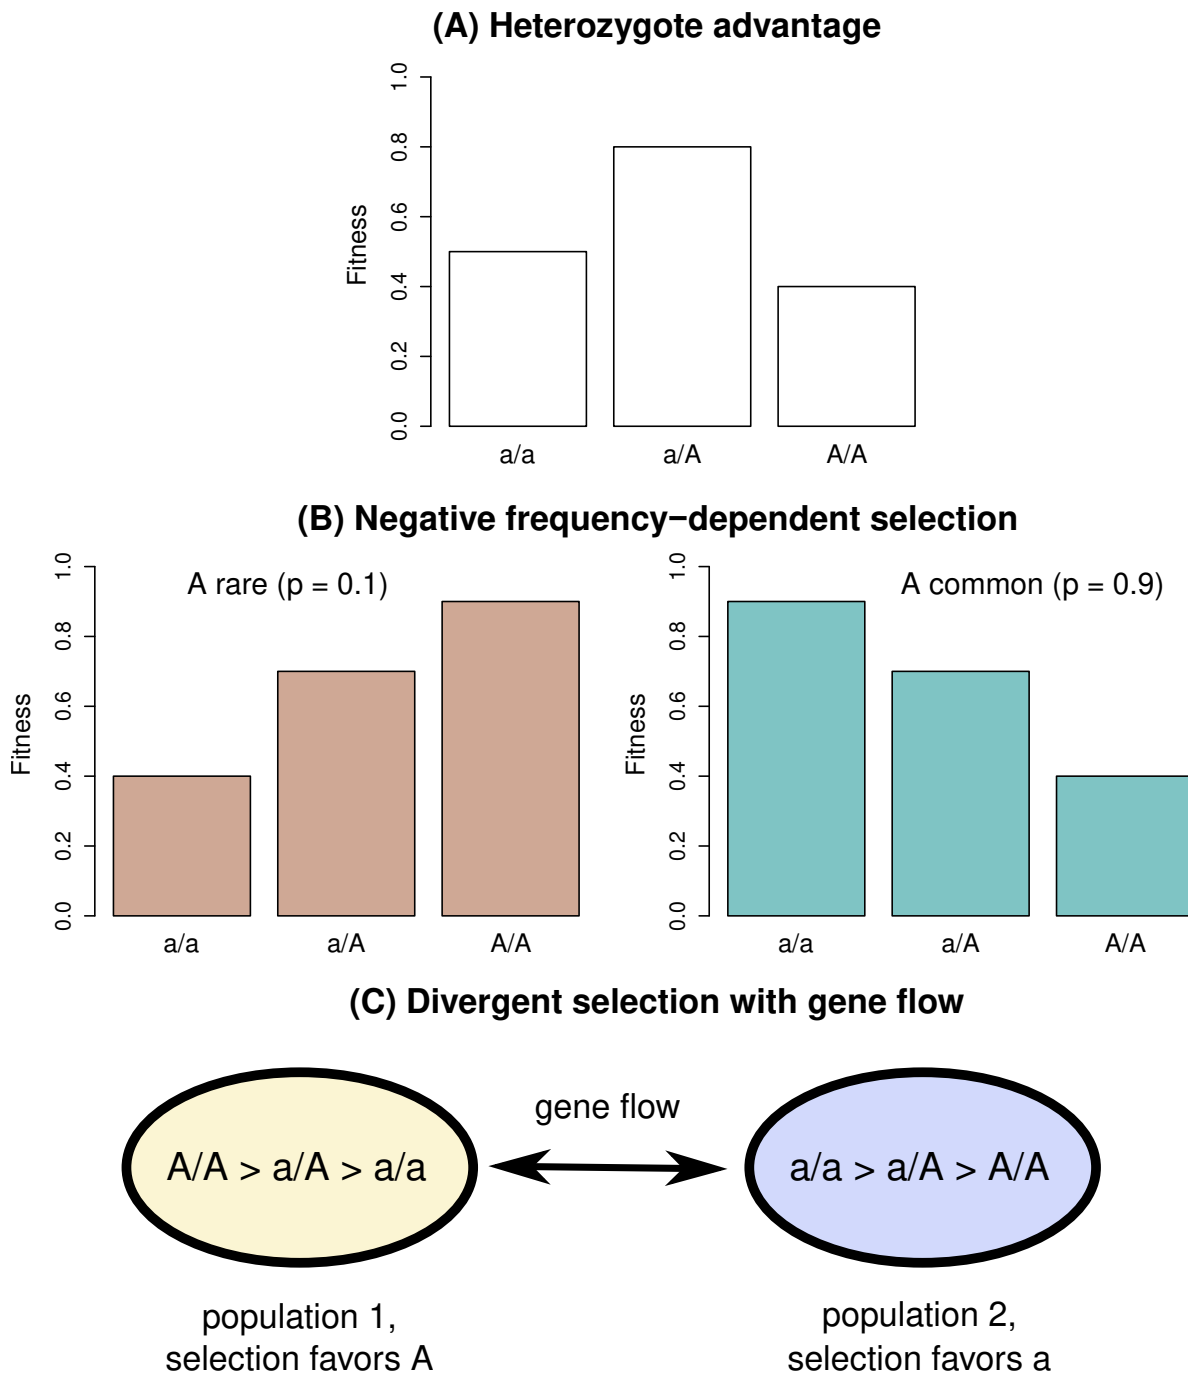

**Fig. S1.** Graphical overview of forms of balancing selection that can maintain genetic variation. Panel (A) shows the case of heterozygote advantage (overdominance) where the heterozygote ( $a/A$ ) has the highest Darwinian fitness. This can occur for several reasons, including life-history trade-offs where the heterozygote has the highest mean fitness across life-history stages. Panel (B) shows negative frequency-dependent selection where selection is always directional (favoring  $a/a$  or  $A/A$  homozygotes) but where the rarer homozygote is most fit. The illustration contrasts cases where the frequency of  $A$  ( $p$ ) is 0.1 versus 0.9. Panel (C) shows balancing selection caused by divergent selection, that is directional selection favoring alternative alleles or genotypes in different populations, combined with gene flow between populations occupying different habitats. Thus, unlike the first two cases, this third case necessarily involves multiple populations. All forms of balancing selection shown here can maintain polymorphism at the population and species level.

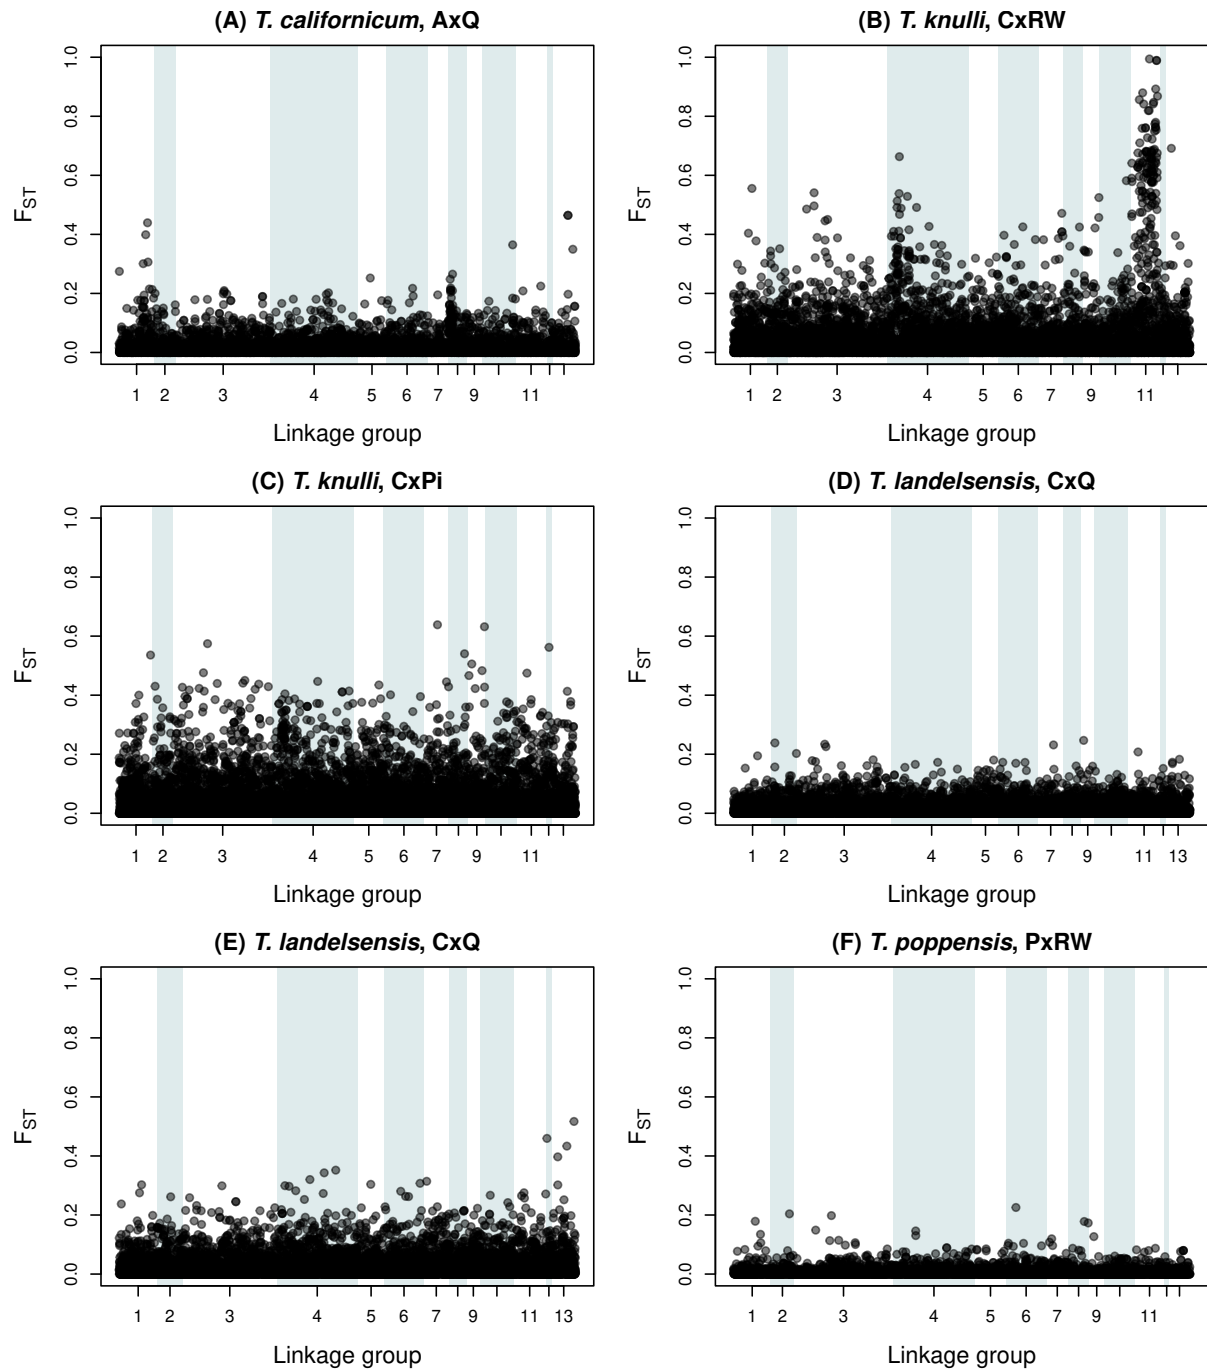

**Fig. S2.** Manhattan plots of genome-wide genetic differentiation for parapatric *Timema* populations on different hosts. Points denote  $F_{ST}$  for individual SNPs organized by *T. cristinae* linkage groups. Host abbreviations are A = *Adenostoma*, C = *Ceanothus*, P = *Pseudotsuga menziesii* (Douglas Fir), Pi = *Pinus* (pine), Q = *Quercus* (oak), and RW = *Sequoia sempervirens* (Redwood).

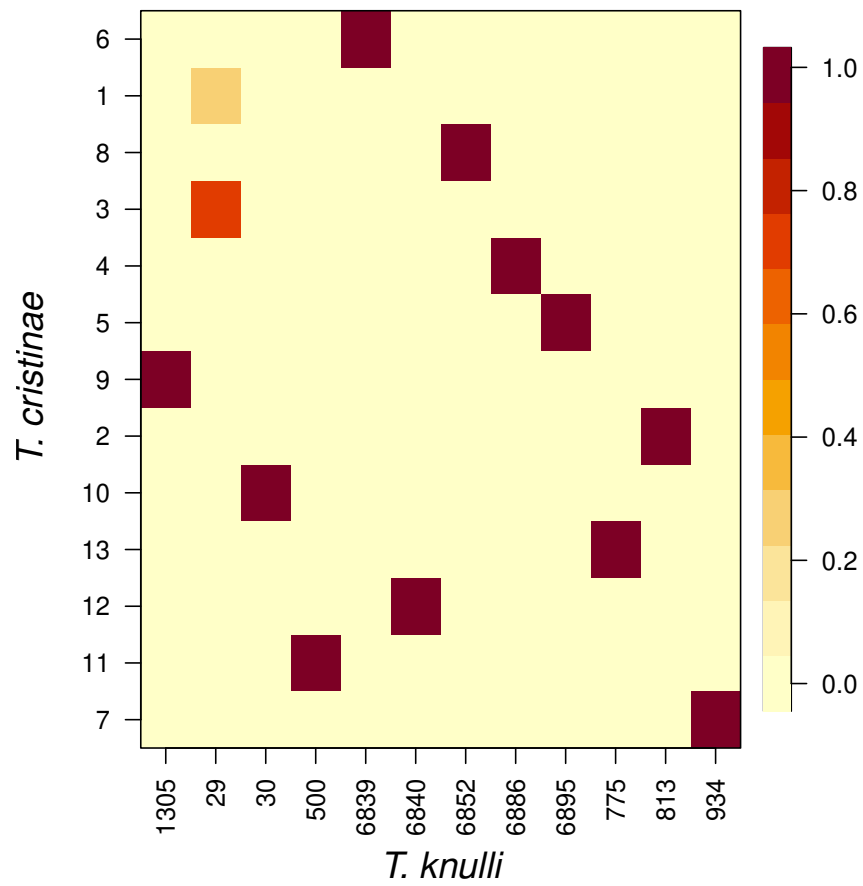

**Fig. S3.** Heatmap shows the proportion syntenic blocks on of each *T. knulli* scaffold that aligned to each of the *T. cristinae* chromosomes.

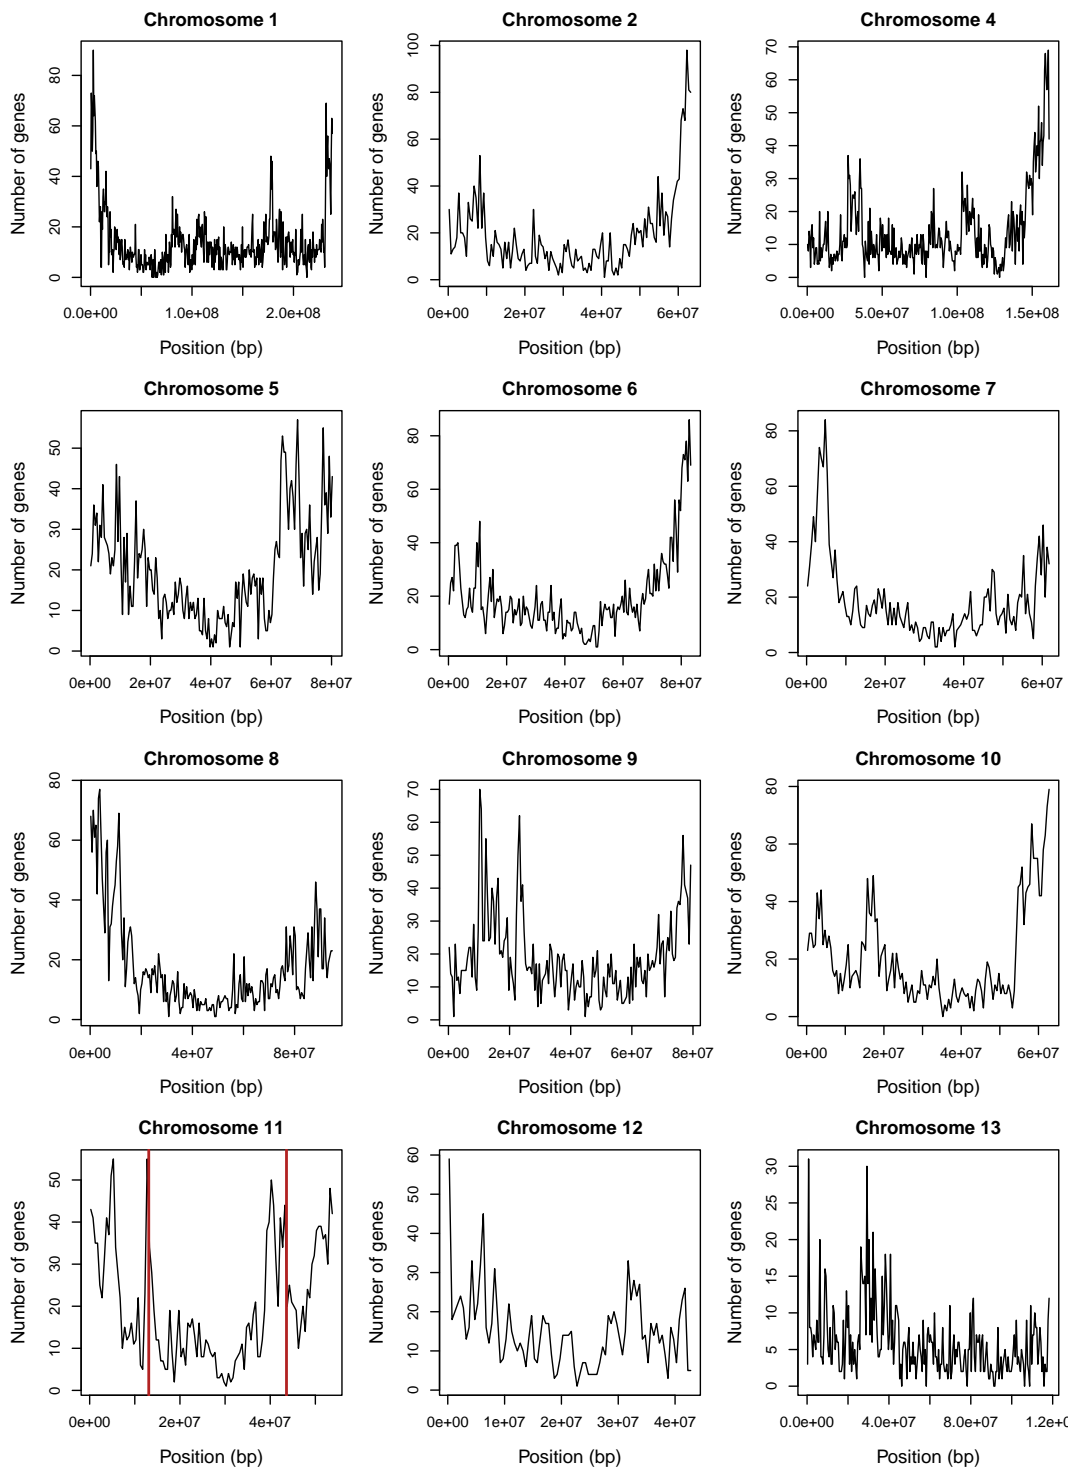

**Fig. S4.** Plots show gene density along *T. knulli* chromosomes. Gene density was calculated as the number of genes overlapping 500 mbp windows. Numerous factors likely contribute to variation in gene density along chromosome, including the location of centromeres (which is not known in *T. knulli*), but notable spikes in gene density are apparent near the bounds of the *Perform* inversion on chromosome 11, as indicated by vertical red lines.

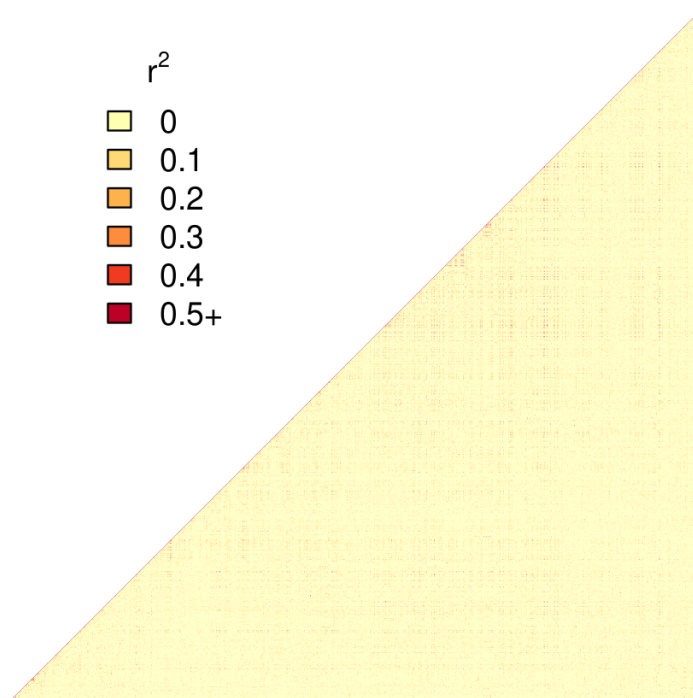

**Fig. S5.** Heatmap showing patterns of pairwise linkage disequilibrium (LD) between SNPs for chromosome 11 in  $P_{RW} P_C T. knulli$  heterozygotes. LD was quantified using the squared genotypic correlation ( $r^2$ ). Heatmaps for additional genotypes and genotype combinations are shown in the main text.



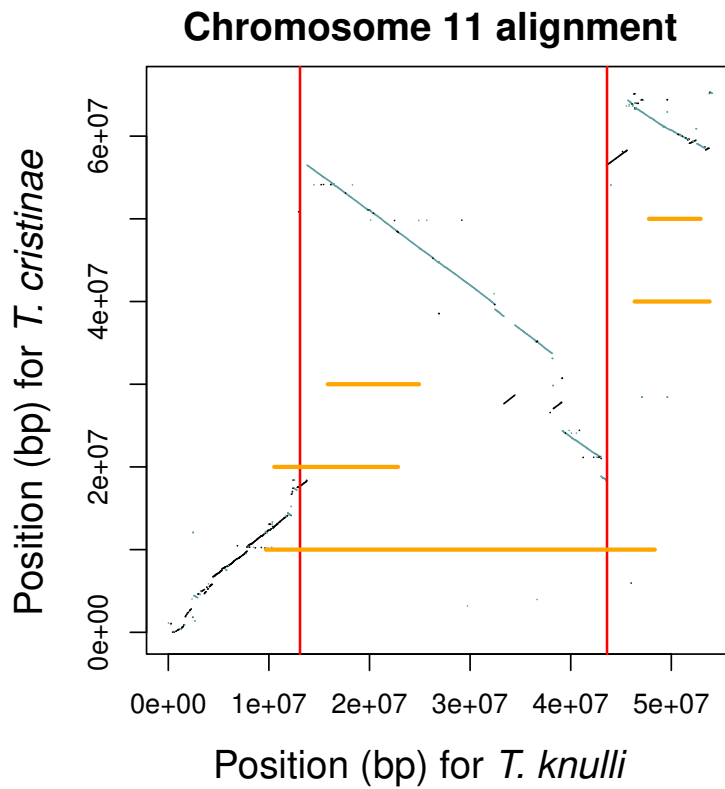

**Fig. S6.** The dot plot shows the alignment of chromosome 11 for *T. knullii* (from Redwood) and *T. cristinae*. Line segments denote aligned genome regions with the orientation of the alignment shown by the direction of the lines. The bounds of the *Perform* locus in the *T. knullii* genome are denoted by the vertical red lines. The location of the five inversions detected on chromosome 11 for the *T. knullii* genome from *Ceanothus* relative to the Redwood *T. knullii* genome are shown with horizontal orange lines. The location of these along the y-axis is arbitrary. These inversions were delineated based on nanopore DNA sequence data. The main text focuses on the largest of these five inversions.

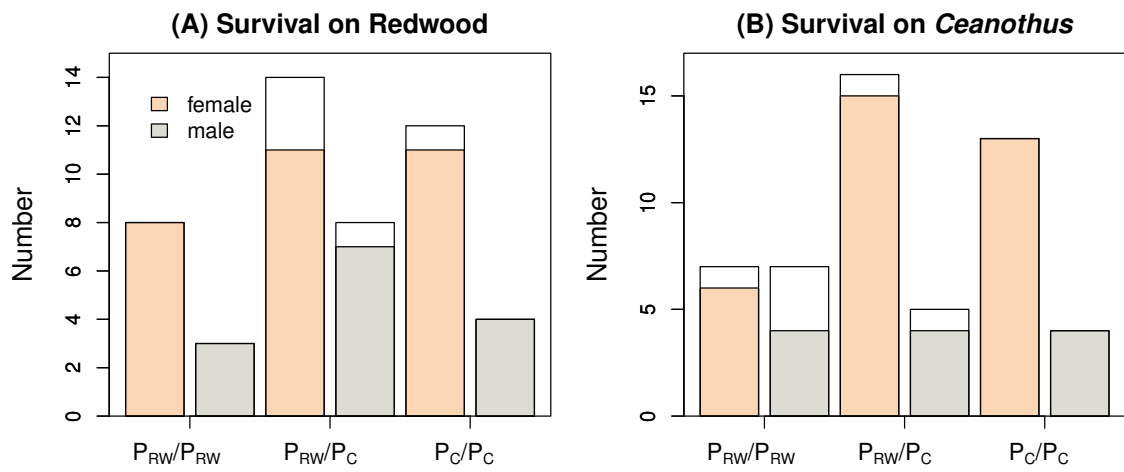

**Fig. S7.** Barplots show the number of individuals with each *Perform* genotype at the start (bar) and end (colored portion of bar) of the rearing experiment on Redwood (A) and *Ceanothus* (B).

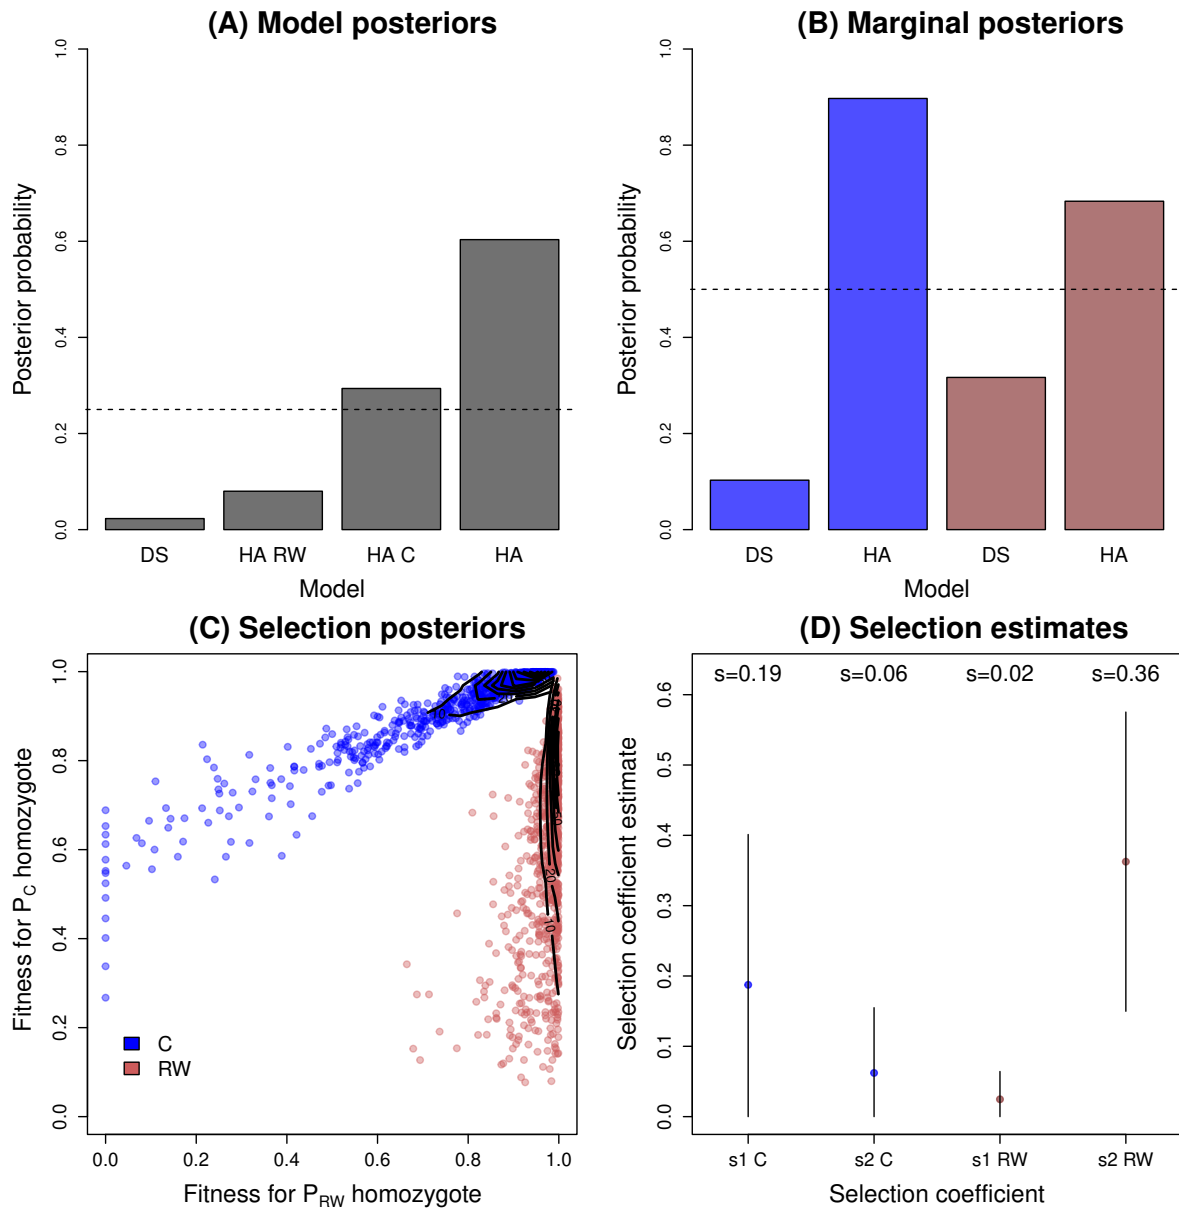

**Fig. S8.** Summary of the ABC results. Panels (A) and (B) given model posterior probabilities. In (A) posteriors are given for DS = divergent directional selection on both hosts, HA RW = heterozygote advantage on Redwood and directional selection on *Ceanothus*, HA C = directional selection on Redwood and heterozygote advantage on *Ceanothus*, and HA = heterozygote advantage on both hosts. In (B) marginal posteriors are shown for directional (DS) versus heterozygote advantage (HA) on each host (indicated by color). Panel (C) shows the joint posterior for the fitness of  $P_{RW}$  versus  $P_C$  homozygotes on each host, where points denote individual samples from the posterior with contours overlain. (D) gives posterior estimates of the selection coefficients  $s_1$  and  $s_2$  (heterozygote advantage) on *Ceanothus* (C) versus Redwood (RW). Points and numbers denote posterior medians and vertical bars indicate 95% credible intervals.

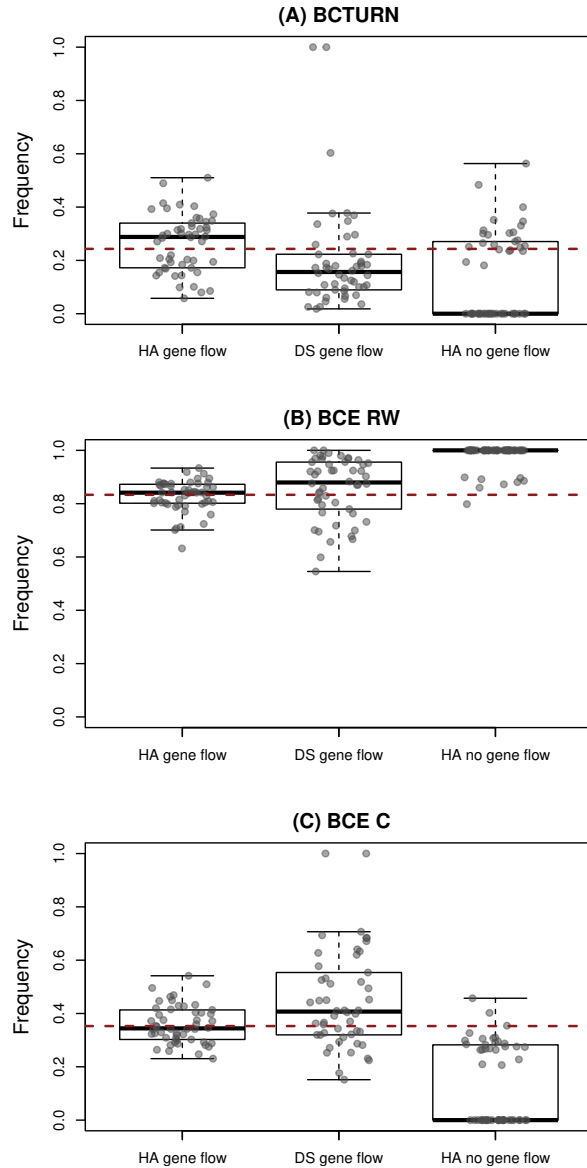

**Fig. S9.** Boxplots show the  $P_{RW}$  allele frequency from simulations for BCTURN (A), BCE RW (B) and BCE C (C) after 250,000 generations of evolution with heterozygote advantage (HA) and gene flow, directional selection (DS) and gene flow, or HA without gene flow. Results are shown for 50 replicate simulations under each set of conditions. Boxes denote the 1st and 3rd quartile, with the median given by the midline and whiskers extending to the minimum and maximum value or  $1.5 \times$  the interquartile range. Points show the allele frequency for each replicate simulation. The observed  $P_{RW}$  allele frequency in each population is shown with a red, dashed line.

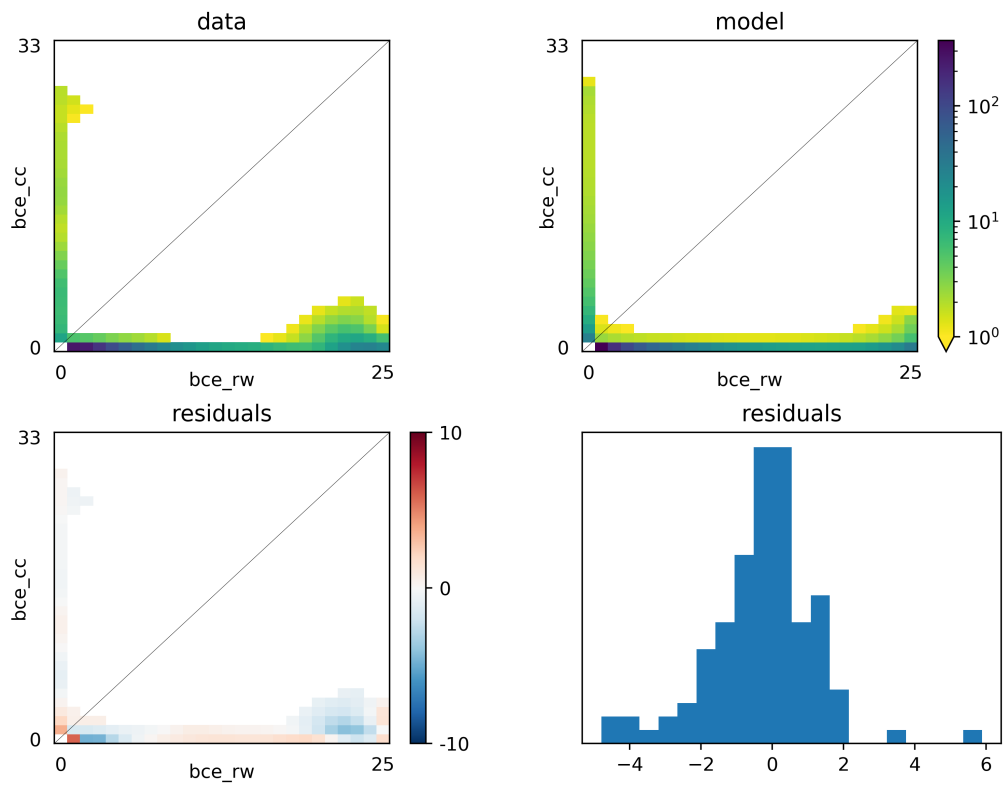

**Fig. S10.** Summary of model fit for divergence time models in  $\delta a \delta i$ . The top panels show the observed (data) and predicted (model) joint site frequency spectra for *Perform* locus. The bottom panels show the corresponding residuals, that is the deviation between the observed and model-predicted joint site frequency spectra.

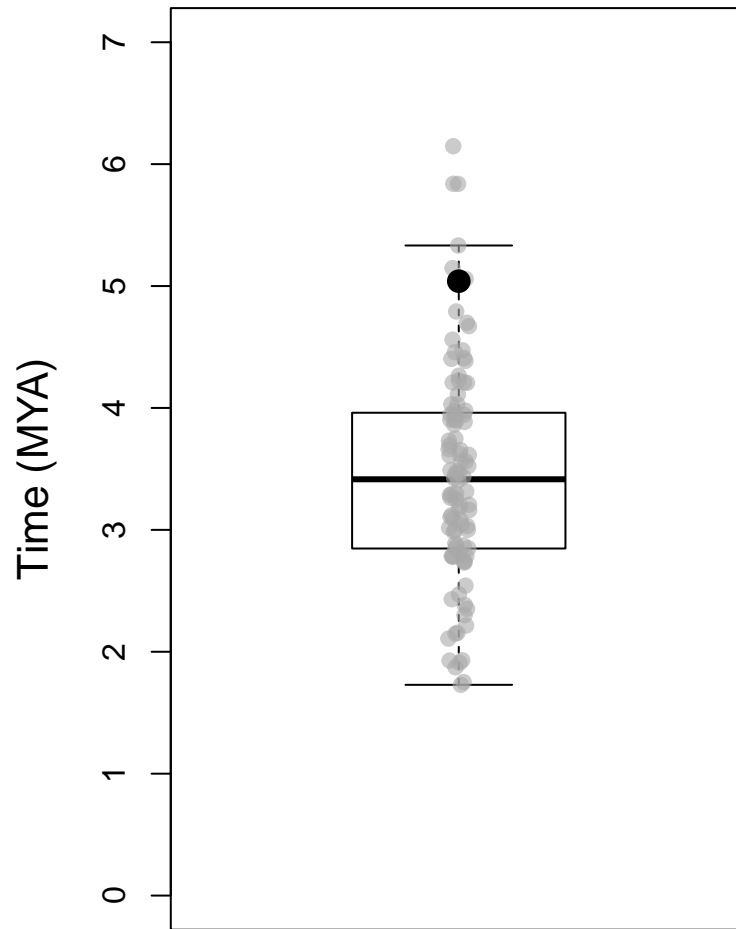

**Fig. S11.** Inversion divergence time estimates from  $\delta a \delta i$ . The boxplot summarizes estimates of divergence time (in millions of years ago = MYA) for each of 100 block-jackknife replicates. Boxes denote the 1st and 3rd quartile, with the median given by the midline and whiskers extending to the minimum and maximum value or  $1.5 \times$  the interquartile range. Gray points denote the estimate for each replicate; the larger black dot indicates the estimate from the full data set.

- 189 1. Brua T, Hoff KJ, Lomsadze A, Stanke M, Borodovsky M (2021) BRAKER2: automatic eukaryotic genome annotation  
190 with GeneMark-EP+ and AUGUSTUS supported by a protein database. *NAR Genomics and Bioinformatics* 3(1):lqaa108.
- 191 2. Villoutreix R, et al. (2020) Large-scale mutation in the evolution of a gene complex for cryptic coloration. *Science*  
192 369(6502):460–466.
- 193 3. Bruna T, Lomsadze A, Borodovsky M (2020) GeneMark-EP+: eukaryotic gene prediction with self-training in the space  
194 of genes and proteins. *NAR Genomics and Bioinformatics* 2(2):lqaa026.
- 195 4. Stanke M, Morgenstern B (2005) AUGUSTUS: a web server for gene prediction in eukaryotes that allows user-defined  
196 constraints. *Nucleic Acids Research* 33(suppl\_2):W465–W467.
- 197 5. Stanke M, et al. (2006) AUGUSTUS: ab initio prediction of alternative transcripts. *Nucleic Acids Research*  
198 34(suppl\_2):W435–W439.
- 199 6. Lomsadze A, Ter-Hovhannisyanyan V, Chernoff YO, Borodovsky M (2005) Gene identification in novel eukaryotic genomes  
200 by self-training algorithm. *Nucleic Acids Research* 33(20):6494–6506.
- 201 7. Gotoh O (2008) A space-efficient and accurate method for mapping and aligning cdna sequences onto genomic sequence.  
202 *Nucleic Acids Research* 36(8):2630–2638.
- 203 8. Buchfink B, Xie C, Huson DH (2015) Fast and sensitive protein alignment using DIAMOND. *Nature Methods* 12(1):59–60.
- 204 9. Kriventseva EV, et al. (2019) OrthoDB v10: sampling the diversity of animal, plant, fungal, protist, bacterial and viral  
205 genomes for evolutionary and functional annotations of orthologs. *Nucleic Acids Research* 47(D1):D807–D811.
- 206 10. Jones P, et al. (2014) InterProScan 5: genome-scale protein function classification. *Bioinformatics* 30(9):1236–1240.
- 207 11. Altschul SF, Gish W, Miller W, Myers EW, Lipman DJ (1990) Basic local alignment search tool. *Journal of Molecular*  
208 *Biology* 215(3):403–410.
- 209 12. Paten B, et al. (2011) **Cactus**: Algorithms for genome multiple sequence alignment. *Genome Research* 21(9):1512–1528.
- 210 13. Armstrong J, et al. (2020) Progressive **cactus** is a multiple-genome aligner for the thousand-genome era. *Nature*  
211 587(7833):246–251.
- 212 14. Smit AF (2010) Repeat-masker open-3.0. <http://www.repeatmasker.org>.
- 213 15. Krashenninnikova K, et al. (2020) **halSynteny**: a fast, easy-to-use conserved synteny block construction method for multiple  
214 whole-genome alignments. *GigaScience* 9(6):giaa047.
- 215 16. Lu H, Giordano F, Ning Z (2016) Oxford Nanopore MinION sequencing and genome assembly. *Genomics, Proteomics &*  
216 *Bioinformatics* 14(5):265–279.
- 217 17. Zhang L, Chaturvedi S, Nice CC, Lucas LK, Gompert Z (2022) Population genomic evidence of selection on structural  
218 variants in a natural hybrid zone. *Molecular Ecology*.
- 219 18. De Coster W, D’hert S, Schultz DT, Cruts M, Van Broeckhoven C (2018) **NanoPack**: visualizing and processing long-read  
220 sequencing data. *Bioinformatics* 34(15):2666–2669.
- 221 19. Li H (2018) **Minimap2**: pairwise alignment for nucleotide sequences. *Bioinformatics* 34(18):3094–3100.
- 222 20. Li H, et al. (2009) The sequence alignment/map format and SAMtools. *Bioinformatics* 25(16):2078–2079.
- 223 21. Smolka M, et al. (2022) Comprehensive structural variant detection: from mosaic to population-level. *BioRxiv*.
- 224 22. Beaumont MA, Zhang W, Balding DJ (2002) Approximate Bayesian computation in population genetics. *Genetics*  
225 162(4):2025–2035.
- 226 23. Sisson SA, Fan Y, Beaumont M (2018) *Handbook of approximate Bayesian computation*. (CRC Press).
- 227 24. Gaggiotti OE, Foll M (2010) Quantifying population structure using the F-model. *Molecular Ecology Resources* 10(5):821–  
228 830.
- 229 25. Gompert Z, Springer A, Brady M, Chaturvedi S, Lucas LK (2021) Genomic time-series data show that gene flow maintains  
230 high genetic diversity despite substantial genetic drift in a butterfly species. *Molecular Ecology* 30(20):4991–5008.
- 231 26. Balding DJ, Nichols RA (1995) A method for quantifying differentiation between populations at multi-allelic loci and its  
232 implications for investigating identity and paternity. *Genetica* 96(1):3–12.
- 233 27. Nicholson G, et al. (2002) Assessing population differentiation and isolation from single-nucleotide polymorphism data.  
234 *Journal of the Royal Statistical Society: Series B (Statistical Methodology)* 64(4):695–715.
- 235 28. Falush D, Stephens M, Pritchard JK (2003) Inference of population structure using multilocus genotype data: linked loci  
236 and correlated allele frequencies. *Genetics* 164(4):1567–1587.
- 237 29. Gompert Z, et al. (2012) Genomic regions with a history of divergent selection affect fitness of hybrids between two  
238 butterfly species. *Evolution* 66(7):2167–2181.
- 239 30. Stan Development Team (2020) **RStan**: the **r** interface to **stan**. R package version 2.21.2.
- 240 31. Hoffman MD, Gelman A, , et al. (2014) The No-U-Turn sampler: adaptively setting path lengths in Hamiltonian Monte  
241 Carlo. *Journal of Machine Learning Research* 15(1):1593–1623.
- 242 32. Ewens WJ (2004) *Mathematical Population Genetics: Theoretical Introduction*. (Springer) Vol. 1.
- 243 33. Galassi M, et al. (2002) *GNU Scientific Library*. (Network Theory Limited Godalming).
- 244 34. Csillery K, Francois O, Blum MGB (2012) **abc**: an **r** package for approximate Bayesian computation (ABC). *Methods in*  
245 *Ecology and Evolution*.
- 246 35. Gutenkunst RN, Hernandez RD, Williamson SH, Bustamante CD (2009) Inferring the joint demographic history of  
247 multiple populations from multidimensional SNP frequency data. *PLoS Genetics* 5(10):e1000695.
- 248 36. Blischak PD, Sajan M, Barker MS, Gutenkunst RN (2022) Demographic history inference and the polyploid continuum.

- 249 *bioRxiv*.
- 250 37. Liu H, et al. (2017) Direct determination of the mutation rate in the bumblebee reveals evidence for weak recombination-
- 251 associated mutation and an approximate rate constancy in insects. *Molecular Biology and Evolution* 34(1):119–130.
- 252 38. Riesch R, et al. (2017) Transitions between phases of genomic differentiation during stick-insect speciation. *Nature Ecology*
- 253 *& Evolution* 1(4):1–13.
- 254 39. Nosil P, et al. (2018) Natural selection and the predictability of evolution in *Timema* stick insects. *Science* 359(6377):765–
- 255 770.
